# Supplementary material for: The inner-nuclear-envelope protein emerin regulates HIV-1 infectivity
Source: Springer Nature journal article supplement (doi:10.1038/nature04682), 2006-05-07
Supplement: nature04682-s1.pdf [file nature04682-s1.pdf]

## Supplementary Figures

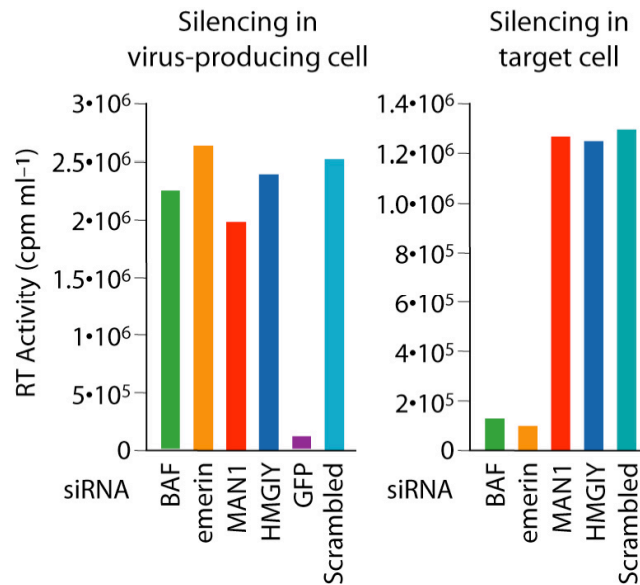

**Supplementary Fig S1:** Silencing of emerin or BAF in virus producing cells does not compromise the infectivity of virus particles that are subsequently produced. HeLa cells were cotransfected with siRNAs and an infectious HIV-1 clone. Viruses were collected after 48 hours and their infectivity measured on a MAGI cell line (left panel). By comparison, silencing of BAF or emerin in MAGI cells impaired their susceptibility to VSV-G-pseudotyped HIV-1 infection (right panel).

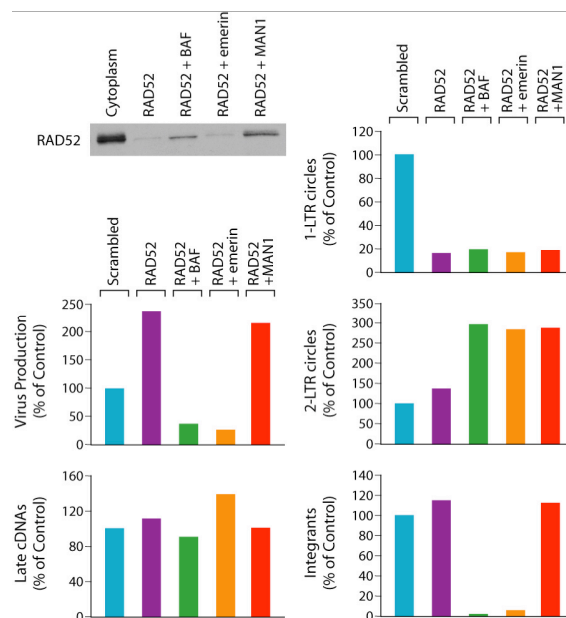

**Supplementary Fig. S2.** Inhibition of HR-mediated 1-LTR circle formation does not alleviate requirements for emerin and BAF in HIV-1 infection. Top panel, Western blot for RAD52 in siRNA-transfected macrophages. Lower panels, infection efficiency and formation of viral cDNA intermediates was analyzed in HIV-1 infected macrophages after simultaneous silencing of nuclear envelope proteins and the HR protein RAD52 which promotes conversion of linear viral cDNA to 1-LTR circles.
